# Supplementary material
Source: PubMed Central journal article supplement (PMC5482366)
Supplement: NIHMS863709-supplement-Supplementary_material.pdf [file NIHMS863709-supplement-Supplementary_material.pdf]

## Supplemental materials

**Table 1: definition of metabolic syndrome according to International Diabetes Federation (IDF) criteria**

|                                                                                                                                                                                                                                                                                                                                                                                                                                                                                                                                                                    |
|--------------------------------------------------------------------------------------------------------------------------------------------------------------------------------------------------------------------------------------------------------------------------------------------------------------------------------------------------------------------------------------------------------------------------------------------------------------------------------------------------------------------------------------------------------------------|
| Central obesity (defined as waist circumference $\geq 94$ and $80$ cm for European men and women, respectively, or with ethnicity specific values for other groups)                                                                                                                                                                                                                                                                                                                                                                                                |
| plus any two of the following four factors:<br>i) triglycerides level $\geq 1.7$ mmol/L, or specific treatment for this lipid abnormality,<br>ii) high-density lipoprotein cholesterol $< 1$ mmol/L in males and $< 1.3$ mmol/L in females, or specific treatment for this lipid abnormality,<br>iii) increased blood pressure (BP) with systolic BP $\geq 130$ or diastolic BP $\geq 85$ mm Hg, or treatment of previously diagnosed hypertension,<br>iv) increased fasting plasma glucose $\geq 100$ mg/dL (5.6 mmol/L), or previously diagnosed type 2 diabetes |

**Figure 1: risk factors associated with hand and thumb base osteoarthritis**

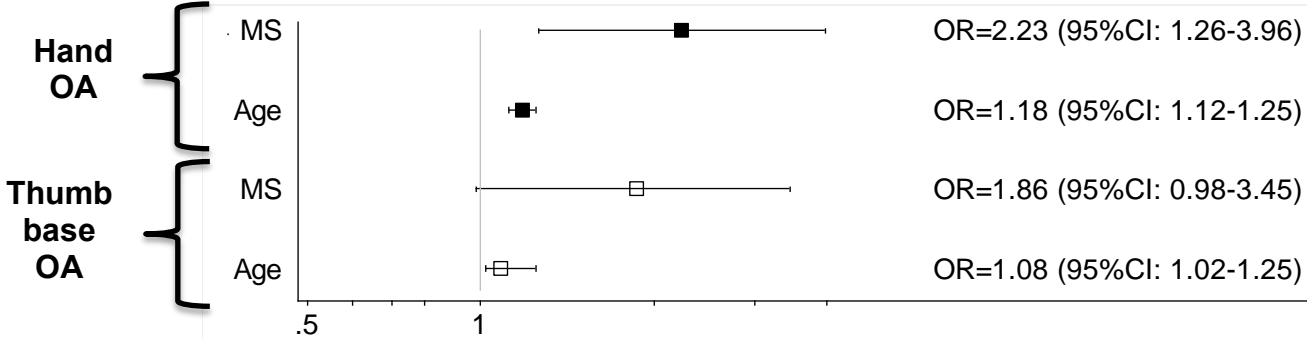

Black squares: Hand osteoarthritis; White squares: thumb base osteoarthritis. OR: odds ratio, 95% CI: 95% confidence interval. MS: metabolic syndrome (presence or absence). Age (per year); OA: osteoarthritis

**Table 2. Determinants of structural severity of radiographic hand osteoarthritis (OA) in the METAFIB-OA study group**

|                                            | Severity    | Univariate p-value | $\beta^3$ | Multivariate p-value |
|--------------------------------------------|-------------|--------------------|-----------|----------------------|
| <b>Sum of KL score</b>                     |             |                    |           |                      |
| Age (per year) <sup>1</sup>                | $\rho=0.31$ | $10^{-5}$          | 0.43      | <0.0001              |
| MetS (mean, SD) <sup>2</sup>               |             |                    |           |                      |
| No                                         | 3.7 (6.11)  | 0.002              | 2.10      | 0.04                 |
| Yes                                        | 6.7 (10.7)  |                    |           |                      |
| <b>No. of affected joints with hand OA</b> |             |                    |           |                      |
| Age (per year) <sup>1</sup>                | $\rho=0.32$ | $10^{-5}$          | 0.43      | <0.0001              |
| MetS (mean, SD) <sup>2</sup>               |             |                    |           |                      |
| No                                         | 1.8 (2.97)  | 0.002              | 1.02      | 0.04                 |
| Yes                                        | 3.2 (4.93)  |                    |           |                      |

<sup>1</sup> $\rho$  coefficient for Pearson correlation. <sup>2</sup>Wilcoxon rank-sum test comparing means.

<sup>3</sup> $\beta$  coefficient of multiple linear regression.

HOA+: Hand osteoarthritis presence, HOA-: Hand osteoarthritis absence

KL: Kellgren-Lawrence score, MetS: metabolic syndrome

**Table 3: Risk factors for radiographic thumb-base (TB) OA**

| Variable                                                        | TB OA Diagnosis  |                   |               | Univariate analysis |             |              |
|-----------------------------------------------------------------|------------------|-------------------|---------------|---------------------|-------------|--------------|
|                                                                 | TB OA+<br>(n=61) | TB OA-<br>(n=240) | P value       | OR                  | 95%CI       | P value      |
| <b>Socio-demographic variables</b>                              |                  |                   |               |                     |             |              |
| Age (years), mean (SD)                                          | 55.3 (5,9)       | 52.9 (4,9)        | <b>0.0008</b> | 1.10                | (1.04-1.17) | <b>0.001</b> |
| Male gender, n (%)                                              | 55 (90.2)        | 210 (87.5)        | 0.4           |                     |             |              |
| Previous hand trauma, n (%)                                     |                  |                   |               |                     |             |              |
| <b>HIV characteristics</b>                                      |                  |                   |               |                     |             |              |
| Duration of HIV infection (years), mean (SD)                    | 18.5 (7.7)       | 17.5 (7.2)        | 0.4           |                     |             |              |
| CD4 level (/mm <sup>3</sup> ), mean (SD)                        | 593 (257)        | 631 (268)         | 0.4           |                     |             |              |
| Undetectable us HIV viral load, n (%)<br>(n=290)                | 36 (59)          | 136 (59.4)        | 0.5           |                     |             |              |
| Duration of exposure to protease inhibitors (months), mean (SD) | 25.2 (32.3)      | 27.6 (32.3)       | 0.6           |                     |             |              |
| <b>Metabolic variables</b>                                      |                  |                   |               |                     |             |              |
| Waist circumference (cm), mean (SD)                             | 93.1 (9.9)       | 92.3 (11.0)       | 0.6           |                     |             |              |
| Obesity (BMI≥30), n (%)                                         | 6 (9,8)          | 26 (10.8)         | 0.5           |                     |             |              |
| Hypertension, n (%)                                             | 10 (16,4)        | 55 (22,9)         | 0,2           |                     |             |              |
| Triglycerides (mmol/l), mean (SD)                               | 2.04 (1.4)       | 1.93 (2.02)       | 0.7           |                     |             |              |
| HDL-cholesterol (mmol/l), mean (SD)                             | 1.19 (0.34)      | 1.21 (0.39)       | 0.7           |                     |             |              |
| HOMA score, mean (SD) (n=297)                                   | 2.40 (2.9)       | 2.5 (2.5)         | 0.8           |                     |             |              |
| Diabetes, n (%)                                                 | 14 (22,9)        | 42 (17,5)         | 0,3           |                     |             |              |
| MetS, n (%)                                                     | 10 (16.4)        | 55 (22.9)         | 0.2           | 1.86                | (0.98-3.45) | 0.06         |

Data are number (%) or mean (SD). Radiographic TB OA definition was presence of ≥ 1 affected joint with a KL score ≥2.

**Table 4. Association between plasma biomarkers and radiographic hand OA**

|                          | Radiographic hand OA |                   |             | Univariate analysis |             | Multivariate   |
|--------------------------|----------------------|-------------------|-------------|---------------------|-------------|----------------|
|                          | OA<br>(n=169)        | Non-OA<br>(n=127) | P value     | OR (95% CI)         | P value     | OR (95% CI)    |
| hsCRP                    | 3.64 (5.35)          | 2.72 (3.12)       | 0.6         |                     |             |                |
| sCD14                    | 2203.8 (915.6)       | 2010.8 (897.9)    | <b>0.02</b> | 4.9 (1.1-21.6)      | <b>0.03</b> | 3.9 (0.9-17.2) |
| sCD163                   | 721.4 (324.6)        | 710.4 (299.1)     | 0.9         |                     |             |                |
| Leptin                   | 9.38 (21.1)          | 8.54 (13.7)       | 0.2         |                     |             |                |
| Total adiponectin        | 4.39 (3.0)           | 4.34 (2.7)        | 0.8         |                     |             |                |
| HMW adiponectin          | 2.11 (2.05)          | 2.07 (1.84)       | 0.8         |                     |             |                |
| Leptin/adiponectin ratio | 2.72 (5.07)          | 2.65 (4.75)       | 0.2         |                     |             |                |
| IL-6                     | 2.35 (5.0)           | 1.74 (1.46)       | 0.6         |                     |             |                |

Abbreviations: hsCRP: high-sensitivity C-reactive protein. HMW: high molecular weight. IL-6: interleukin 6

All data are mean (SD).

<sup>1</sup>Adjusted for presence of MetS
